# Supplementary material
Source: publisher figshare collection journal article supplement (https://karger.figshare.com/ndownloader/files/39629398)
Supplement: Supplementary file 1 [file 39629398]

| **Inclusion Criteria** | **Exclusion Criteria** |
| --- | --- |
| Patient with clinically relevant grass pollen sensitization with rhinoconjunctivitis symptoms caused by grass pollen for at least 2 years. | Pregnancy and lactation |
| Male or female patient aged 18-65 years. | Immunotherapy with grass pollen within the last five years |
| Non-smoking patient for at least one year. | Severe and/or uncontrolled asthma within 3 months before screening |
| No relevant co-allergies | An FEV1< 80% before exposure |
| Positive prick test for grass pollen with a diameter of urtica of ≥ 3mm | An acute upper respiratory tract infection |
| Patient able and willing to comply with study procedures according to protocol | Tuberculosis or other relevant infectious processes |
| Patient who can understand, speak, and write the German language | An acute sinusitis or acute otitis media |
| Verbal and written informed consent | Had or have intolerances to epinephrine and/or rescue medications or were taking prohibited concomitant medications during the test period or if the washout period before screening and allergen exposure was inadequate |

**Table S1: Inclusion and exclusion criteria**
